# Supplementary material for: Nicotine Use and DSM-IV Nicotine Dependence in the United States, 2001–2002 and 2012–2013
Source: Atypon-hosted journal article supplement (doi:10.1176/appi.ajp.2020.19090900), 2020-08-14
Supplement: appi.ajp.2020.19090900.ds001.pdf [file appi.ajp.2020.19090900.ds001.pdf]

**TABLE S1. Prevalences and adjusted risk differences of 12-month approximate FTND dependence by sociodemographic characteristics**

| Characteristic             | NESARC<br>n=5,593 |      | NESARC-III<br>n=5,238 |      | Adjusted Risk<br>Difference <sup>a</sup> | Adjusted Risk<br>Difference <i>P</i> <sup>a</sup> | Adjusted<br>Additive<br>Interaction <i>P</i> <sup>a</sup> |
|----------------------------|-------------------|------|-----------------------|------|------------------------------------------|---------------------------------------------------|-----------------------------------------------------------|
|                            | %                 | SE   | %                     | SE   | %                                        |                                                   |                                                           |
| Total                      | 14.5              | .45  | 14.7                  | .37  | 1.8                                      | 0.0000                                            | n/a                                                       |
| Sex                        |                   |      |                       |      |                                          |                                                   |                                                           |
| Men                        | 16.9              | .57  | 17.4                  | .50  | 2.3                                      | 0.0001                                            | 0.1944                                                    |
| Women                      | 12.3              | .42  | 12.2                  | .40  | 1.4                                      | 0.0013                                            | Ref                                                       |
| Age, y                     |                   |      |                       |      |                                          |                                                   |                                                           |
| 18-29                      | 16.0              | .69  | 15.9                  | .62  | 1.1                                      | 0.1623                                            | 0.9906                                                    |
| 30-44                      | 16.6              | .73  | 17.1                  | .60  | 2.8                                      | 0.0004                                            | 0.0658                                                    |
| 45-64                      | 15.8              | .57  | 16.4                  | .58  | 1.8                                      | 0.0067                                            | 0.3535                                                    |
| ≥65                        | 5.9               | .30  | 6.2                   | .38  | 1.2                                      | 0.0009                                            | Ref                                                       |
| Race-ethnicity             |                   |      |                       |      |                                          |                                                   |                                                           |
| White                      | 16.4              | .40  | 16.9                  | .49  | 1.9                                      | 0.0002                                            | Ref                                                       |
| Black                      | 12.2              | .55  | 14.2                  | .60  | 1.9                                      | 0.0040                                            | 0.9923                                                    |
| Native American            | 25.0              | 2.09 | 24.5                  | 3.05 | 1.1                                      | 0.7406                                            | 0.7869                                                    |
| Asian/Pacific Islander     | 6.1               | .79  | 5.9                   | .60  | 0.6                                      | 0.5844                                            | 0.2779                                                    |
| Hispanic                   | 5.9               | .63  | 7.2                   | .42  | 1.5                                      | 0.0106                                            | 0.5302                                                    |
| Marital status             |                   |      |                       |      |                                          |                                                   |                                                           |
| Married/cohabiting         | 12.9              | .46  | 12.4                  | .47  | 1.6                                      | 0.0020                                            | Ref                                                       |
| Widowed/divorced/separated | 18.9              | .69  | 19.3                  | .59  | 2.0                                      | 0.0077                                            | 0.6612                                                    |
| Never married              | 15.4              | .65  | 16.5                  | .51  | 2.1                                      | 0.0006                                            | 0.5403                                                    |
| Education                  |                   |      |                       |      |                                          |                                                   |                                                           |
| Less than high school      | 18.6              | 1.09 | 21.7                  | .96  | 4.2                                      | 0.0002                                            | 0.0025                                                    |
| High school                | 18.2              | .60  | 20.3                  | .62  | 3.3                                      | 0.0000                                            | 0.0008                                                    |
| Some college or higher     | 11.3              | .37  | 10.8                  | .30  | 0.6                                      | 0.1653                                            | Ref                                                       |
| Family income, \$          |                   |      |                       |      |                                          |                                                   |                                                           |
| 0-19,999                   | 16.7              | .65  | 21.9                  | .65  | 4.7                                      | 0.0000                                            | 0.0000                                                    |
| 20,000-34,999              | 17.0              | .65  | 16.4                  | .59  | 1.5                                      | 0.0554                                            | 0.0315                                                    |
| 35,000-69,999              | 15.0              | .56  | 15.0                  | .45  | 1.9                                      | 0.0011                                            | 0.0034                                                    |
| ≥70000                     | 9.5               | .50  | 8.0                   | 0.46 | -0.5                                     | 0.4263                                            | Ref                                                       |
| Urbanicity                 |                   |      |                       |      |                                          |                                                   |                                                           |
| Urban                      | 13.3              | .49  | 13.4                  | .36  | 1.7                                      | 0.0003                                            | 0.5054                                                    |
| Rural                      | 19.1              | .53  | 19.2                  | 1.00 | 2.3                                      | 0.0042                                            | Ref                                                       |
| Region                     |                   |      |                       |      |                                          |                                                   |                                                           |
| Northeast                  | 13.4              | .88  | 12.9                  | .60  | 1.3                                      | 0.1209                                            | 0.9114                                                    |
| Midwest                    | 17.6              | .82  | 17.4                  | .78  | 1.5                                      | 0.0410                                            | 0.7686                                                    |
| South                      | 14.9              | .58  | 16.2                  | .76  | 2.6                                      | 0.0001                                            | 0.2449                                                    |
| West                       | 11.5              | .95  | 11.1                  | .65  | 1.2                                      | 0.2384                                            | Ref                                                       |

<sup>a</sup> Adjusted for all other covariates

**TABLE S2. Prevalences and adjusted risk differences of 12-month approximate FTND dependence among 12-month nicotine users by sociodemographic characteristics**

| Characteristic             | NESARC<br>n=5,593 |      | NESARC-III<br>n=5,238 |      | Adjusted Risk<br>Difference <sup>a</sup> | Adjusted Risk<br>Difference <i>P</i> <sup>a</sup> | Adjusted<br>Additive<br>Interaction <i>P</i> <sup>a</sup> |
|----------------------------|-------------------|------|-----------------------|------|------------------------------------------|---------------------------------------------------|-----------------------------------------------------------|
|                            | %                 | SE   | %                     | SE   | %                                        |                                                   |                                                           |
| Total                      | 52.3              | .80  | 54.3                  | .82  | 3.1                                      | 0.0022                                            | n/a                                                       |
| Sex                        |                   |      |                       |      |                                          |                                                   |                                                           |
| Men                        | 49.9              | .98  | 52.7                  | 0.96 | 4.1                                      | 0.0013                                            | 0.1447                                                    |
| Women                      | 55.8              | .99  | 56.5                  | 1.11 | 1.7                                      | 0.2187                                            | Ref                                                       |
| Age, y                     |                   |      |                       |      |                                          |                                                   |                                                           |
| 18-29                      | 49.0              | 1.32 | 51.0                  | 1.36 | 3.2                                      | 0.0790                                            | 0.2847                                                    |
| 30-44 (1.54)               | 53.0              | 1.29 | 53.6                  | 1.19 | 2.6                                      | 0.1055                                            | 0.1856                                                    |
| 45-64                      | 56.7              | 1.21 | 58.8                  | 1.15 | 2.6                                      | 0.1034                                            | 0.1755                                                    |
| ≥65                        | 43.1              | 1.62 | 47.2                  | 1.91 | 6.6                                      | 0.0087                                            | Ref                                                       |
| Race-ethnicity             |                   |      |                       |      |                                          |                                                   |                                                           |
| White                      | 55.3              | .82  | 57.6                  | 0.99 | 2.5                                      | 0.0373                                            | Ref                                                       |
| Black                      | 49.3              | 1.25 | 52.1                  | 1.61 | 3.2                                      | 0.1162                                            | 0.7745                                                    |
| Native American            | 60.3              | 3.56 | 65.6                  | 5.28 | 5.2                                      | 0.4113                                            | 0.6769                                                    |
| Asian/Pacific Islander     | 39.6              | 5.02 | 37.8                  | 3.50 | -0.1                                     | 0.9869                                            | 0.6673                                                    |
| Hispanic                   | 29.9              | 1.97 | 37.1                  | 1.76 | 7.6                                      | 0.0040                                            | 0.0750                                                    |
| Marital status             |                   |      |                       |      |                                          |                                                   |                                                           |
| Married/cohabiting         | 51.2              | .98  | 52.4                  | 1.14 | 2.8                                      | 0.0413                                            | Ref                                                       |
| Widowed/divorced/separated | 59.0              | 1.18 | 60.1                  | 1.28 | 2.7                                      | 0.1276                                            | 0.9472                                                    |
| Never married              | 49.2              | 1.38 | 52.7                  | 1.20 | 4.1                                      | 0.0147                                            | 0.5145                                                    |
| Education                  |                   |      |                       |      |                                          |                                                   |                                                           |
| Less than high school      | 57.2              | 1.59 | 60.4                  | 1.54 | 3.6                                      | 0.0726                                            | 0.3703                                                    |
| High school                | 55.7              | 1.08 | 59.5                  | 1.24 | 5.0                                      | 0.0012                                            | 0.0676                                                    |
| Some college or higher     | 47.9              | .98  | 48.7                  | .96  | 1.6                                      | 0.2331                                            | Ref                                                       |
| Family income, \$          |                   |      |                       |      |                                          |                                                   |                                                           |
| 0-19,999                   | 55.6              | 1.10 | 61.0                  | 1.11 | 5.7                                      | 0.0001                                            | 0.0577                                                    |
| 20,000-34,999              | 54.4              | 1.21 | 53.3                  | 1.33 | -0.1                                     | 0.9438                                            | 0.6839                                                    |
| 35,000-69,999              | 53.7              | 1.17 | 56.7                  | 1.11 | 4.5                                      | 0.0037                                            | 0.1891                                                    |
| ≥70000                     | 43.1              | 1.64 | 42.8                  | 1.83 | 0.9                                      | 0.6910                                            | Ref                                                       |
| Urbanicity                 |                   |      |                       |      |                                          |                                                   |                                                           |
| Urban                      | 51.2              | .94  | 52.6                  | .86  | 2.8                                      | 0.0114                                            | 0.6528                                                    |
| Rural                      | 55.9              | 1.34 | 59.3                  | 1.58 | 3.9                                      | 0.0615                                            | Ref                                                       |
| Region                     |                   |      |                       |      |                                          |                                                   |                                                           |
| Northeast                  | 52.0              | 1.71 | 53.1                  | 1.80 | 2.9                                      | 0.2078                                            | 0.8405                                                    |
| Midwest                    | 56.9              | 1.59 | 56.9                  | 1.54 | 1.1                                      | 0.5594                                            | 0.7178                                                    |
| South                      | 50.8              | 1.15 | 55.2                  | 1.41 | 4.9                                      | 0.0028                                            | 0.3395                                                    |
| West                       | 49.4              | 2.07 | 50.0                  | 1.78 | 2.2                                      | 0.3477                                            | Ref                                                       |

<sup>a</sup> Adjusted for all other covariates
